# Supplementary material for: Copper/ruthenium relay catalysis for stereodivergent construction of 1,4-nonadjacent stereocenters: mechanistic investigation using DFT calculations
Source: Royal Society of Chemistry journal article supplement (doi:10.1039/d4qo00780h), 2024-01-01
Supplement: d4qo00780h1.pdf [file d4qo00780h1.pdf]

## *Supporting Information*

### **Copper/Ruthenium Relay Catalysis for Stereodivergent Construction of 1,4-Nonadjacent Stereocenters: Mechanistic Investigation Using DFT Calculations**

Congcong Huang, Biyao Yang, Keying Zhang and Juan Li\*

Department of Chemistry, Guangdong Provincial Key Laboratory of Functional Supramolecular Coordination Materials and Applications, Jinan University, Guangzhou, Guangdong 510632, P. R. China

\*Corresponding author. Email: tchjli@jnu.edu.cn (J. Li)

---

### **Table of Contents**

---

|                  |                                                                                                 |     |
|------------------|-------------------------------------------------------------------------------------------------|-----|
| <b>Section 1</b> | Other Possible Isomers (Schemes S1-S6)                                                          | S2  |
| <b>Section 2</b> | Optimization with BP86 and M06L Methods (Table S1)                                              | S5  |
| <b>Section 3</b> | Alternative Pathways for Stage I (Figs. S1-S4)                                                  | S6  |
| <b>Section 4</b> | Alternative Pathways for Stage II (Figs. S5-S6)                                                 | S8  |
| <b>Section 5</b> | Alternative Pathways for Stage III (Fig. S7)                                                    | S9  |
| <b>Section 6</b> | Alternative Pathways for the Reduction 1-Phenylprop-2-en-1-one and Ketimine Ester (Figs. S8-S9) | S10 |
| <b>Section 7</b> | Supplementary Data: Other Findings (Scheme S7 and Fig. S10)                                     | S11 |
| <b>Section 8</b> | Energies (in Hartree) of All TSs and Intermediates                                              | S12 |
| <b>Section 9</b> | Calculated Imaginary Frequencies of All Transition States Species                               | S16 |

---

## Section 1. Other Possible Isomers

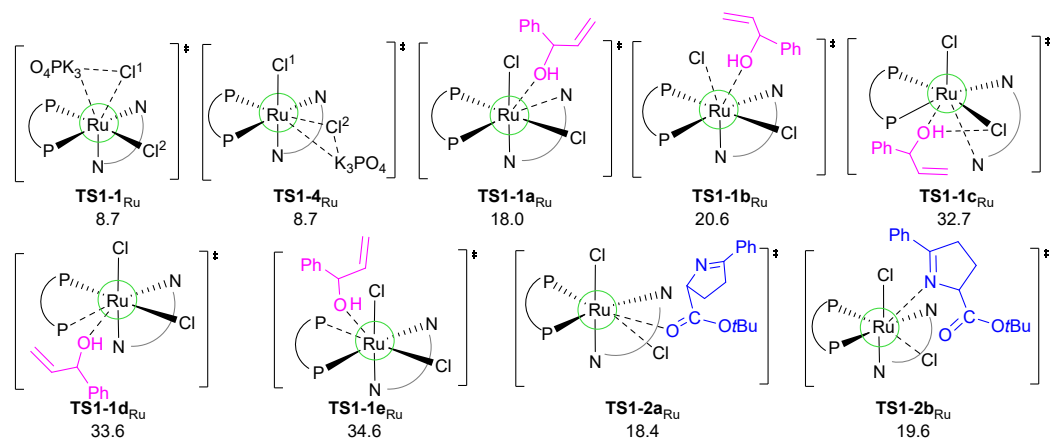

**Scheme S1** Other possible isomers of transition states  $\text{TS1-1}_{\text{Ru}}$  and  $\text{TS1-2}_{\text{Ru}}$ . Values

shown are relative free energies in kcal/mol.

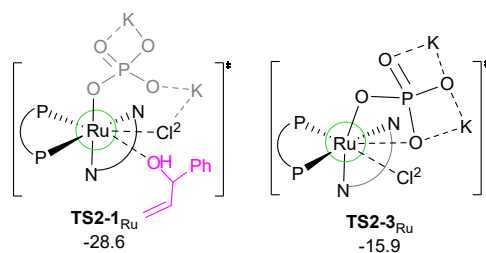

**Scheme S2** Other possible isomers of transition states  $\text{TS2-1}_{\text{Ru}}$ . Values shown are

relative free energies in kcal/mol.

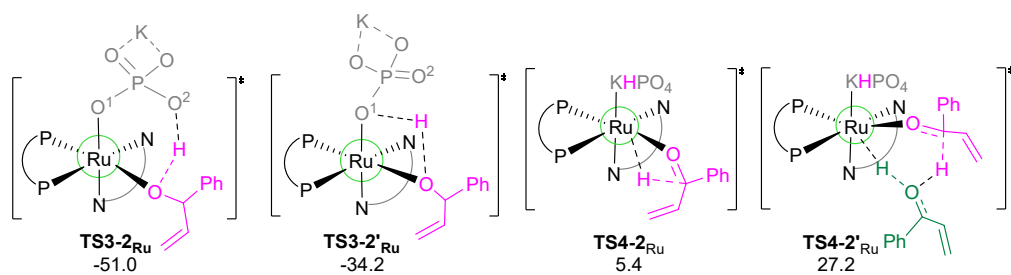

**Scheme S3** Other possible isomers of transition states  $\text{TS3-2}_{\text{Ru}}$  and  $\text{TS4-2}_{\text{Ru}}$ . Values

shown are relative free energies in kcal/mol.

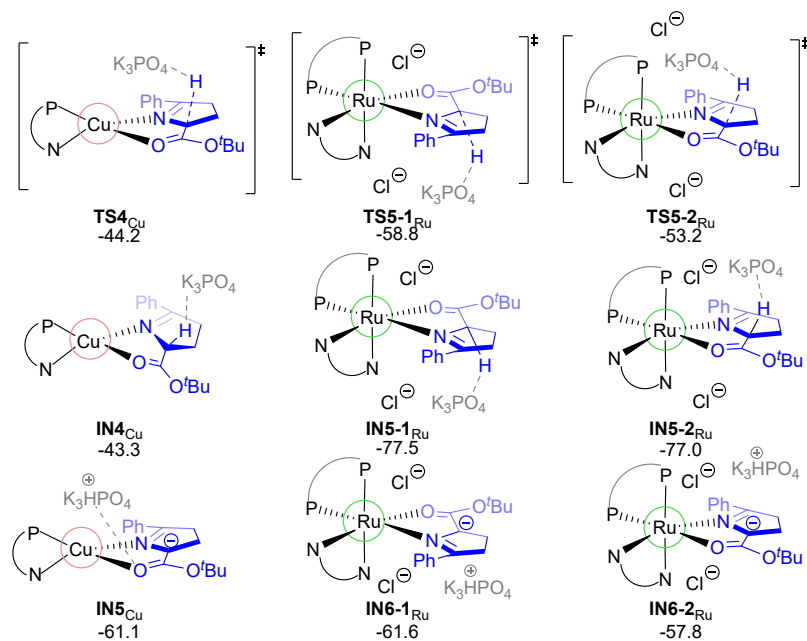

**Scheme S4** Other possible isomers of transition state **TS4<sub>Cu</sub>** and their corresponding intermediates. Values shown are relative free energies in kcal/mol.

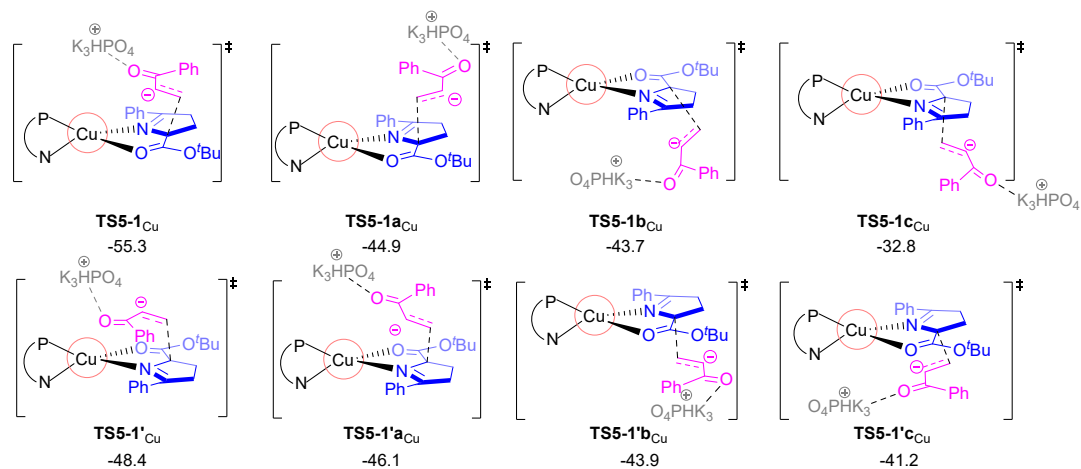

**Scheme S5** Other possible isomers of transition states **TS5-1<sub>Cu</sub>** and **TS5-1'<sub>Cu</sub>**. Values shown are relative free energies in kcal/mol.

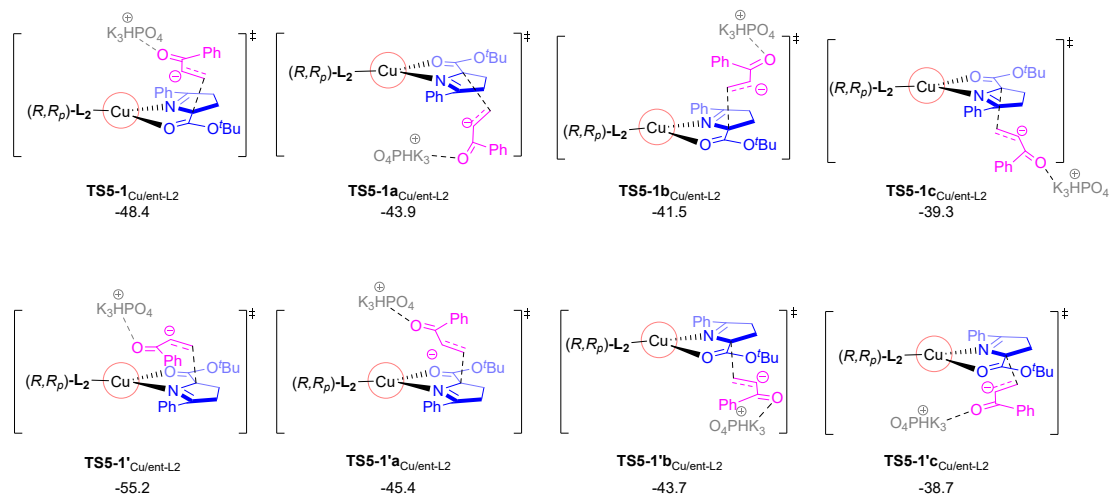

**Scheme S6** Other possible isomers of transition states **TS5-1<sub>Cu/ent-L2</sub>** and **TS5-1'<sub>Cu/ent-</sub>**

**L2**. Values shown are relative free energies in kcal/mol.

## Section 2. Optimization with BP86 and M06L Methods

**Table S1.** Relative Gibbs energies (in kcal/mol) for the important transition states with BP86 and M06L methods.

| Species                   | $\Delta\Delta G$ ( B3LYP) | $\Delta\Delta G$ ( BP86) | $\Delta\Delta G$ ( M06L) |
|---------------------------|---------------------------|--------------------------|--------------------------|
| <b>TS4-1<sub>Ru</sub></b> | 0.0                       | 0.0                      | 0.0                      |
| <b>TS4-2<sub>Ru</sub></b> | 36.3                      | 32.3                     | 17.3                     |
| <b>TS6-1<sub>Cu</sub></b> | 0.0                       | 0.0                      | 0.0                      |
| <b>TS6-2<sub>Cu</sub></b> | 4.6                       | 4.3                      | 7.7                      |

### Section 3. Alternative Pathways for Stage I

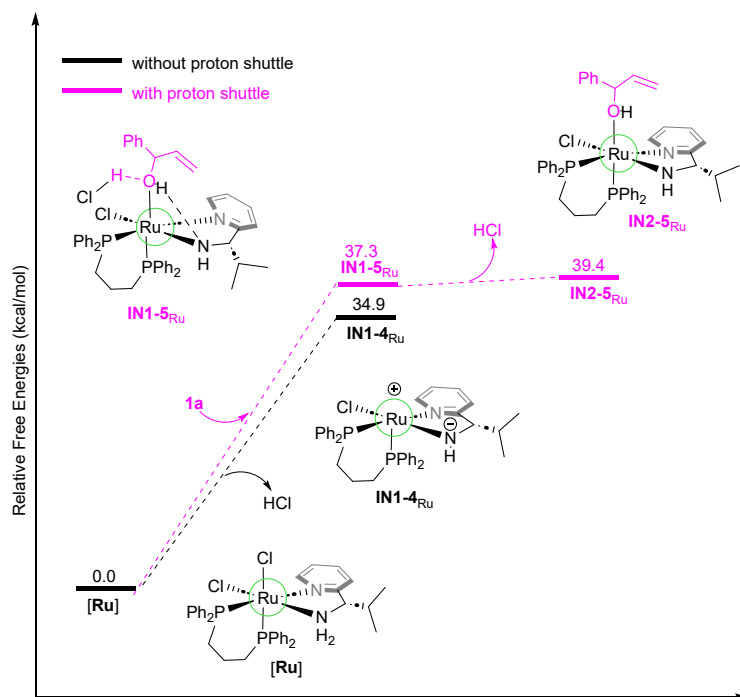

**Fig. S1** Calculated energy profiles for the HCl elimination process with and without proton shuttle in Stage I. Values shown are relative free energies in kcal/mol.

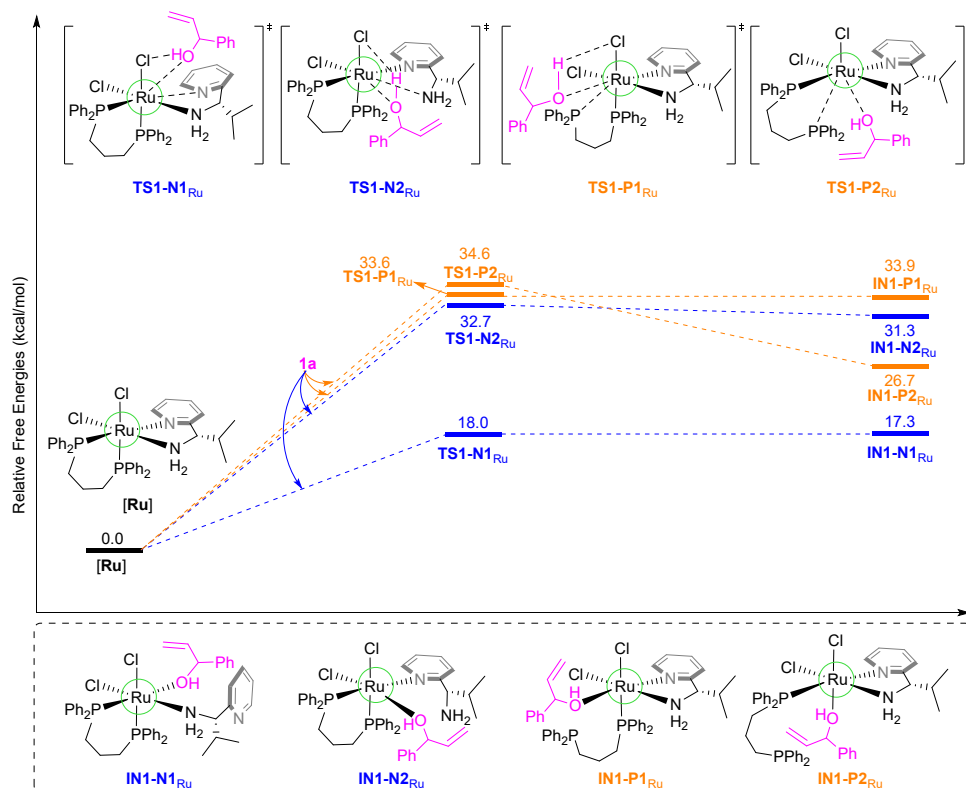

**Fig. S2** Calculated energy profiles for the partial decooordination of the bidentate

ligand. Values shown are relative free energies in kcal/mol.

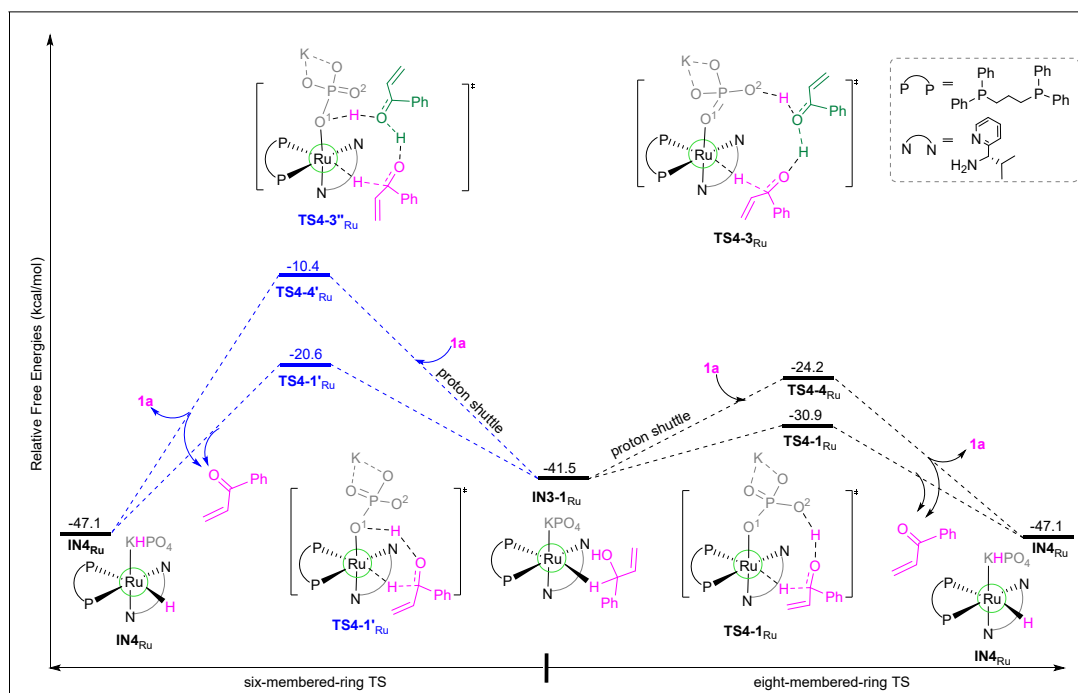

**Fig. S3** Calculated energy profiles for the BDHT of **1a** using a proton shuttle mechanism. Values shown are relative free energies in kcal/mol.

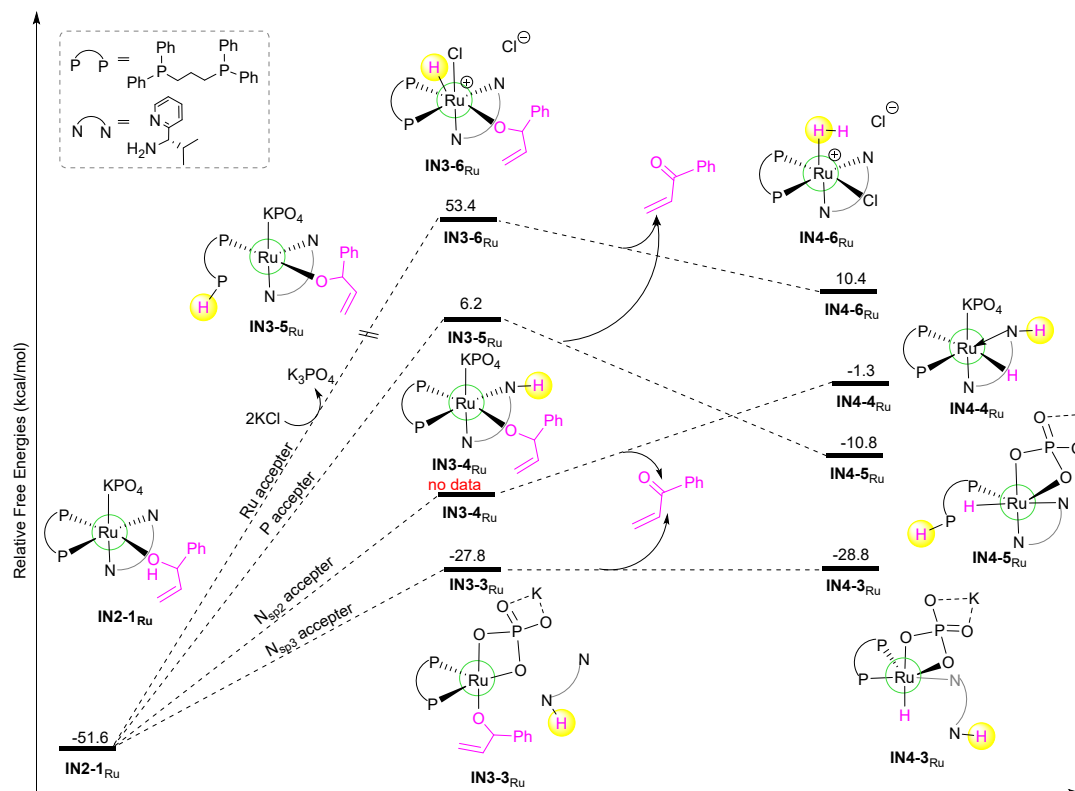

**Fig. S4** Calculated energy profiles for the other possible alcohol-dehydrogenation

processes. Values shown are relative free energies in kcal/mol.

## Section 4. Alternative pathways for Stage II

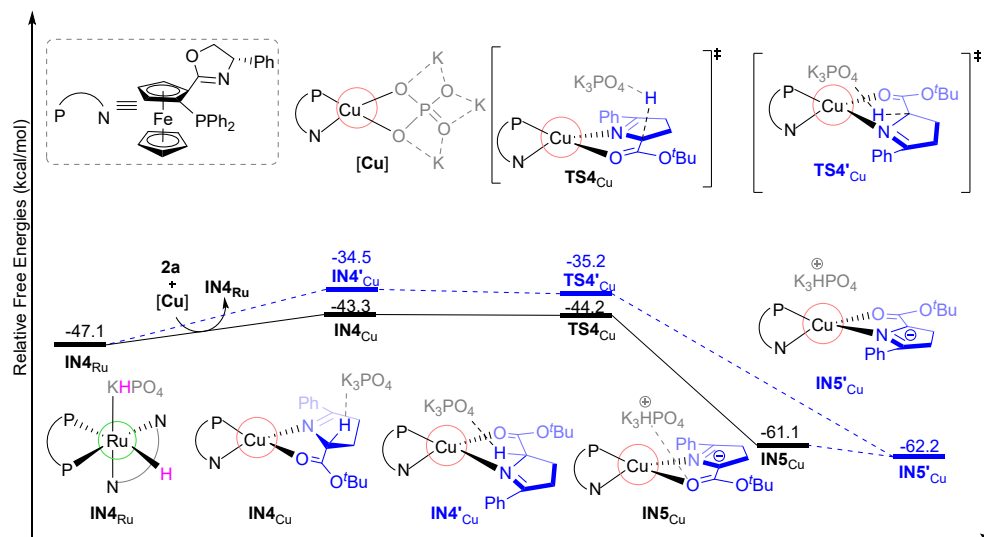

**Fig. S5** Calculated energy profiles for the alternative pathways to form  $IM5'_{Cu}$ .

Values shown are relative free energies in kcal/mol.

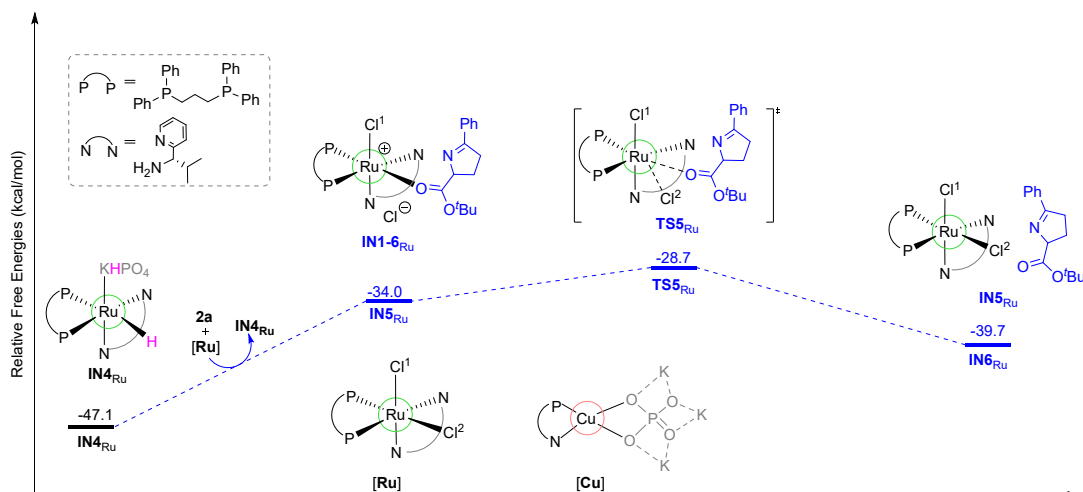

**Fig. S6** Calculated energy profiles for the ligand-exchange process of Stage II catalyzed by ruthenium. Values shown are relative free energies in kcal/mol.



## Section 5. Alternative pathways in Stage III

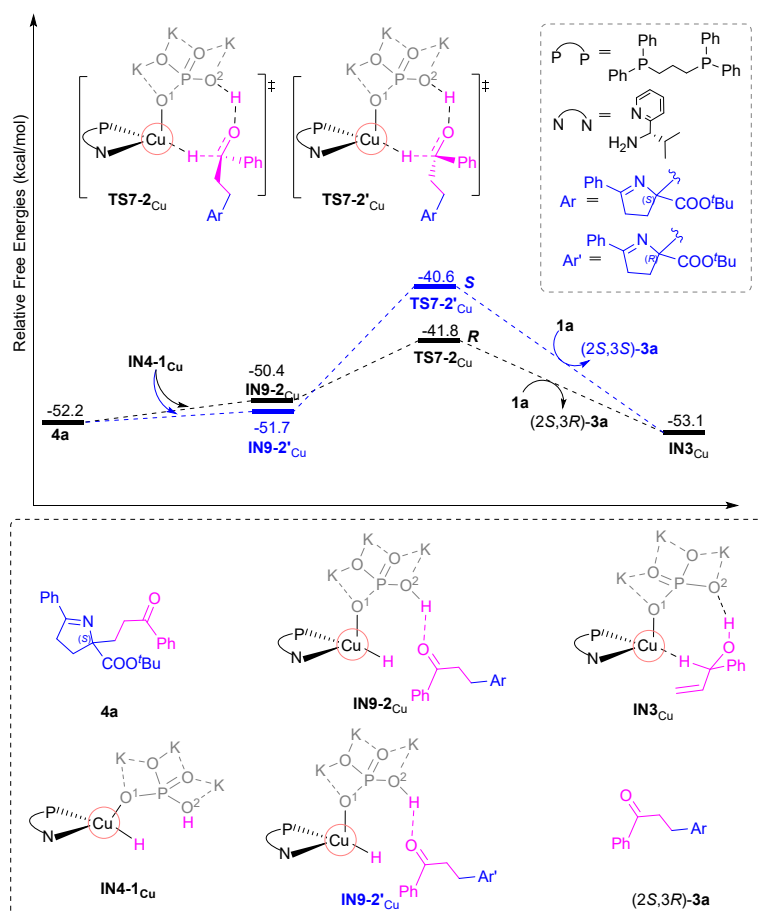

**Fig. S7** Calculated energy profiles for Stage III catalyzed by copper. Values shown are relative free energies in kcal/mol.

## Section 6. Alternative Pathways for the Reduction of 1-Phenylprop-2-en-1-one and Ketimine Ester

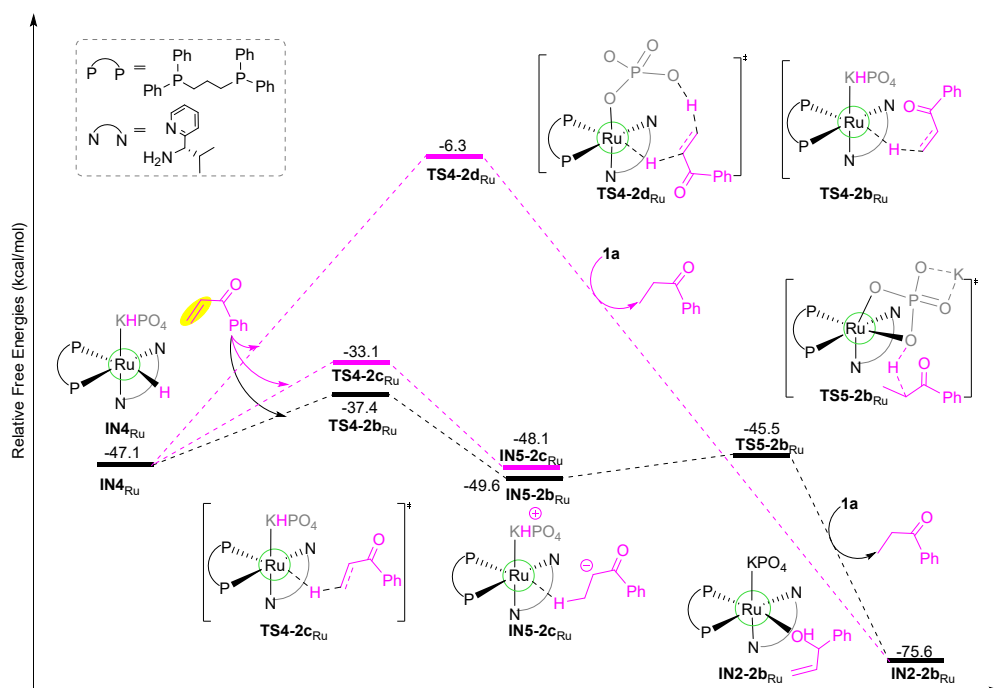

**Fig. S8** Calculated energy profiles for alternative reduction pathways of 1-phenylprop-2-en-1-one. Values shown are relative free energies in kcal/mol.

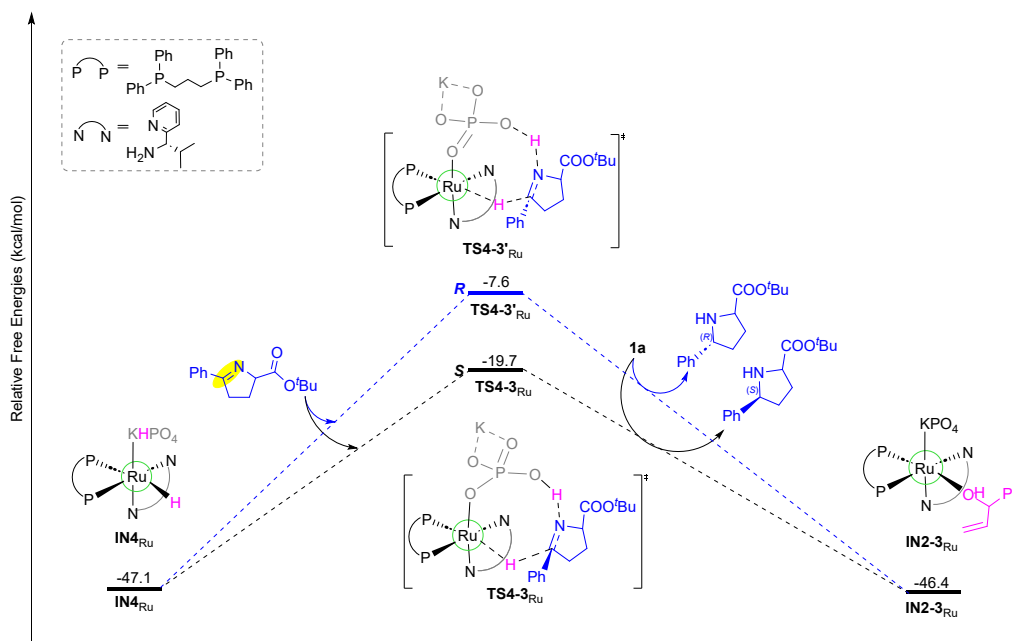

**Fig. S9** Calculated energy profiles for alternative reduction pathways of ketimine ester. Values shown are relative free energies in kcal/mol.

## Section 7. Supplementary Data: Other Findings

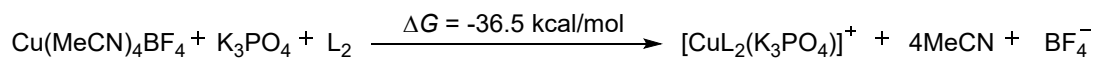

**Scheme S7** Activation of the original catalyst  $\text{Cu}(\text{MeCN})_4\text{BF}_4$ .

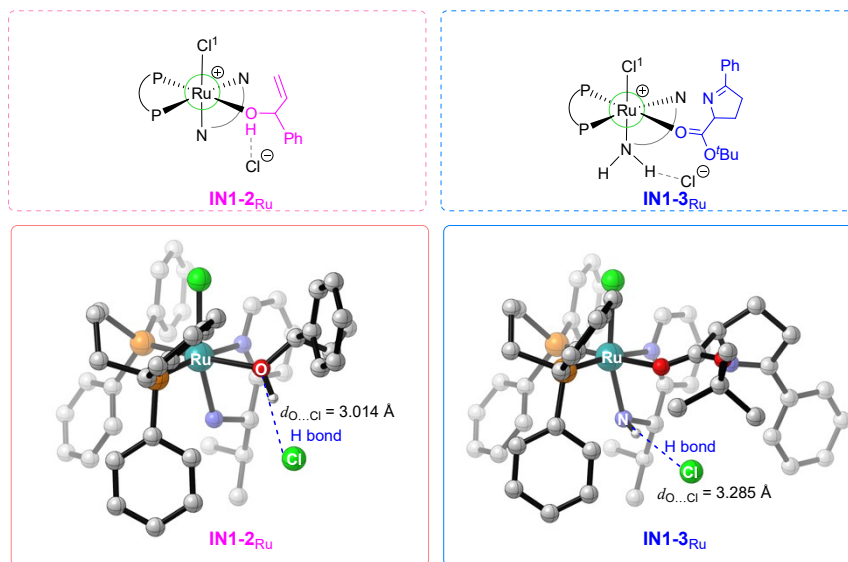

**Fig. S10** Optimized geometries, selected bond lengths in angstroms ( $\text{\AA}$ ) of intermediate IN1-2<sub>Ru</sub> and IN1-3<sub>Ru</sub>

## Section 8. Energies (in Hartree) of all TSs and Intermediates

| Geometry             | $E_0$        | $E$          | $H_{293.15}$ | $G_{293.15}$ | $E_{(\text{sol},\text{B3LYP})}$ |
|----------------------|--------------|--------------|--------------|--------------|---------------------------------|
| [Ru]                 | -3203.0694   | -3203.029074 | -3203.028146 | -3203.140617 | -3204.339178                    |
| TS1-1 <sub>Ru</sub>  | -3930.563971 | -3930.513235 | -3930.512307 | -3930.647998 | -3932.01626                     |
| IN1-1 <sub>Ru</sub>  | -3930.63735  | -3930.585168 | -3930.584239 | -3930.725564 | -3932.08638                     |
| TS1-2 <sub>Ru</sub>  | -3627.082222 | -3627.031767 | -3627.030838 | -3627.168474 | -3628.655604                    |
| IN1-2 <sub>Ru</sub>  | -3627.115927 | -3627.065635 | -3627.064707 | -3627.199389 | -3628.685715                    |
| TS1-3 <sub>Ru</sub>  | -3991.035257 | -3990.977085 | -3990.976157 | -3991.128779 | -3992.859972                    |
| IN1-3 <sub>Ru</sub>  | -3991.057966 | -3990.99983  | -3990.998901 | -3991.150104 | -3992.872686                    |
| TS2-1 <sub>Ru</sub>  | -4354.680057 | -4354.618877 | -4354.617949 | -4354.778907 | -4356.424137                    |
| IN2-1 <sub>Ru</sub>  | -4354.673397 | -4354.611962 | -4354.611034 | -4354.772754 | -4356.412971                    |
| TS2-2 <sub>Ru</sub>  | -4718.62969  | -4718.560176 | -4718.559248 | -4718.737974 | -4720.622482                    |
| IN2-2 <sub>Ru</sub>  | -4718.645618 | -4718.575813 | -4718.574884 | -4718.752584 | -4720.641221                    |
| IN1-4 <sub>Ru</sub>  | -2742.211492 | -2742.172795 | -2742.171867 | -2742.28176  | -2743.41836                     |
| IN1-5 <sub>Ru</sub>  | -3627.044974 | -3626.995662 | -3626.994734 | -3627.129516 | -3628.602733                    |
| IN2-5 <sub>Ru</sub>  | -3166.249207 | -3166.200799 | -3166.199871 | -3166.331646 | -3167.753019                    |
| TS1-N1 <sub>Ru</sub> | -3627.081091 | -3627.030263 | -3627.029335 | -3627.167796 | -3628.646311                    |
| IN1-N1 <sub>Ru</sub> | -3627.086353 | -3627.035077 | -3627.034149 | -3627.172099 | -3628.649166                    |
| TS1-N2 <sub>Ru</sub> | -3627.058272 | -3627.007401 | -3627.006472 | -3627.142902 | -3628.624672                    |
| IN1-N2 <sub>Ru</sub> | -3627.058722 | -3627.006945 | -3627.006016 | -3627.144817 | -3628.625177                    |
| TS1-P1 <sub>Ru</sub> | -3627.051088 | -3627.000693 | -3626.999765 | -3627.136286 | -3628.62232                     |
| IN1-P1 <sub>Ru</sub> | -3627.054047 | -3627.003298 | -3627.00237  | -3627.138919 | -3628.624582                    |
| TS1-P2 <sub>Ru</sub> | -3627.046941 | -3626.995794 | -3626.994866 | -3627.135972 | -3628.616055                    |
| IN1-P2 <sub>Ru</sub> | -3627.061439 | -3627.010273 | -3627.009345 | -3627.149757 | -3628.631942                    |
| TS1-4 <sub>Ru</sub>  | -3930.566386 | -3930.515403 | -3930.514475 | -3930.651596 | -3932.014096                    |
| TS1-1a <sub>Ru</sub> | -3627.081091 | -3627.030263 | -3627.029335 | -3627.167796 | -3628.646311                    |
| TS1-1b <sub>Ru</sub> | -3627.068938 | -3627.018861 | -3627.017932 | -3627.153771 | -3628.64494                     |
| TS1-1c <sub>Ru</sub> | -3627.058272 | -3627.007401 | -3627.006472 | -3627.142902 | -3628.624672                    |
| TS1-1d <sub>Ru</sub> | -3627.051088 | -3627.000693 | -3626.999765 | -3627.136286 | -3628.62232                     |
| TS1-1e <sub>Ru</sub> | -3627.046941 | -3626.995794 | -3626.994866 | -3627.135972 | -3628.616055                    |
| TS1-2a <sub>Ru</sub> | -3991.035257 | -3990.977085 | -3990.976157 | -3991.128779 | -3992.859972                    |
| TS1-2b <sub>Ru</sub> | -3991.039191 | -3990.981809 | -3990.980881 | -3991.129938 | -3992.862568                    |
| TS2-3 <sub>Ru</sub>  | -3930.609786 | -3930.558666 | -3930.557738 | -3930.695156 | -3932.051223                    |
| IN3-3 <sub>Ru</sub>  | -4354.676374 | -4354.614535 | -4354.613606 | -4354.774848 | -4356.413045                    |
| IN4-3 <sub>Ru</sub>  | -4354.672144 | -4354.609581 | -4354.608653 | -4354.772962 | -4356.409368                    |
| IN4-4 <sub>Ru</sub>  | -4354.625679 | -4354.562853 | -4354.561925 | -4354.726946 | -4356.362234                    |
| IN3-5 <sub>Ru</sub>  | -4354.595554 | -4354.533239 | -4354.53231  | -4354.696807 | -4356.350068                    |
| IN4-5 <sub>Ru</sub>  | -4354.634844 | -4354.571235 | -4354.570307 | -4354.739775 | -4356.373653                    |
| IN3-6 <sub>Ru</sub>  | -3627.014766 | -3626.964602 | -3626.963673 | -3627.098101 | -3628.59055                     |
| IN4-6 <sub>Ru</sub>  | -3204.21467  | -3204.173533 | -3204.172605 | -3204.287022 | -3205.519635                    |
| TS3-1 <sub>Ru</sub>  | -4354.658538 | -4354.596671 | -4354.595743 | -4354.759241 | -4356.414943                    |
| IN3-1 <sub>Ru</sub>  | -4354.684244 | -4354.622573 | -4354.621645 | -4354.782365 | -4356.433988                    |

|                             |              |              |              |              |              |
|-----------------------------|--------------|--------------|--------------|--------------|--------------|
| <b>TS4-1<sub>Ru</sub></b>   | -4354.672516 | -4354.611284 | -4354.610355 | -4354.769282 | -4356.413989 |
| <b>IN4<sub>Ru</sub></b>     | -3931.830562 | -3931.777523 | -3931.776595 | -3931.921516 | -3933.297981 |
| <b>TS3-2<sub>Ru</sub></b>   | -4354.704409 | -4354.643316 | -4354.642387 | -4354.801679 | -4356.447406 |
| <b>IN3-2<sub>Ru</sub></b>   | -4354.702091 | -4354.640629 | -4354.639701 | -4354.800131 | -4356.447271 |
| <b>IN3-2'<sub>Ru</sub></b>  | -4354.67238  | -4354.61047  | -4354.609542 | -4354.771682 | -4356.420411 |
| <b>TS4-2<sub>Ru</sub></b>   | -4354.616665 | -4354.555628 | -4354.5547   | -4354.711783 | -4356.356875 |
| <b>TS3-2'<sub>Ru</sub></b>  | -4354.674438 | -4354.613119 | -4354.61219  | -4354.7727   | -4356.41955  |
| <b>TS4-2'<sub>Ru</sub></b>  | -4778.630214 | -4778.559773 | -4778.558844 | -4778.736637 | -4780.661523 |
| <b>TS4-4<sub>Ru</sub></b>   | -4778.69829  | -4778.626544 | -4778.625616 | -4778.808263 | -4780.749873 |
| <b>TS4-1'<sub>Ru</sub></b>  | -4354.647799 | -4354.586526 | -4354.585598 | -4354.743493 | -4356.399047 |
| <b>TS4-4'<sub>Ru</sub></b>  | -4778.682408 | -4778.611313 | -4778.610385 | -4778.789868 | -4780.71949  |
| <b>[Cu]</b>                 | -2716.608371 | -2716.567243 | -2716.566315 | -2716.685699 | -2717.710917 |
| <b>IN4<sub>Cu</sub></b>     | -3504.608934 | -3504.55004  | -3504.549111 | -3504.706119 | -3506.257947 |
| <b>TS4<sub>Cu</sub></b>     | -3504.611647 | -3504.553321 | -3504.552393 | -3504.707575 | -3506.257306 |
| <b>IN5<sub>Cu</sub></b>     | -3504.639981 | -3504.58057  | -3504.579642 | -3504.736974 | -3506.28591  |
| <b>IN6-1<sub>Cu</sub></b>   | -3927.496276 | -3927.426959 | -3927.426031 | -3927.607647 | -3929.41422  |
| <b>TS5-1<sub>Cu</sub></b>   | -3927.487273 | -3927.419153 | -3927.418224 | -3927.59792  | -3929.411826 |
| <b>IN7-1<sub>Cu</sub></b>   | -3927.498786 | -3927.430881 | -3927.429952 | -3927.608356 | -3929.428819 |
| <b>IN5'<sub>Cu</sub></b>    | -3504.601862 | -3504.542387 | -3504.541458 | -3504.701785 | -3506.25827  |
| <b>IN6-1'<sub>Cu</sub></b>  | -3927.506271 | -3927.436579 | -3927.435651 | -3927.617954 | -3929.422887 |
| <b>TS5-1'<sub>Cu</sub></b>  | -3927.477967 | -3927.410066 | -3927.409138 | -3927.587878 | -3929.401768 |
| <b>IN7-1'<sub>Cu</sub></b>  | -3927.48847  | -3927.420858 | -3927.419929 | -3927.596378 | -3929.419799 |
| <b>TS6-1<sub>Cu</sub></b>   | -3927.491841 | -3927.425144 | -3927.424216 | -3927.596273 | -3929.410022 |
| <b>IN8-1<sub>Cu</sub></b>   | -3927.499746 | -3927.432801 | -3927.431873 | -3927.604784 | -3929.421718 |
| <b>TS6-2<sub>Cu</sub></b>   | -3927.477122 | -3927.40959  | -3927.408662 | -3927.586245 | -3929.400182 |
| <b>IN8-2<sub>Cu</sub></b>   | -3927.484331 | -3927.416485 | -3927.415556 | -3927.595012 | -3929.406787 |
| <b>4a</b>                   | -1210.841771 | -1210.816847 | -1210.815919 | -1210.897467 | -1211.675651 |
| <b>IN4'<sub>Cu</sub></b>    | -3504.585942 | -3504.526985 | -3504.526056 | -3504.685397 | -3506.242544 |
| <b>TS4'<sub>Cu</sub></b>    | -3504.587473 | -3504.528817 | -3504.527889 | -3504.686372 | -3506.238964 |
| <b>IN5'<sub>Cu</sub></b>    | -3504.601862 | -3504.542387 | -3504.541458 | -3504.701785 | -3506.25827  |
| <b>IN5<sub>Ru</sub></b>     | -3991.057966 | -3990.99983  | -3990.998901 | -3991.150104 | -3992.872686 |
| <b>TS5<sub>Ru</sub></b>     | -3991.035257 | -3990.977085 | -3990.976157 | -3991.128779 | -3992.859972 |
| <b>IN6<sub>Ru</sub></b>     | -3991.052871 | -3990.993772 | -3990.992844 | -3991.150121 | -3992.875753 |
| <b>IN5-1<sub>Ru</sub></b>   | -4718.609264 | -4718.53901  | -4718.538082 | -4718.716823 | -4720.627068 |
| <b>TS5-1<sub>Ru</sub></b>   | -4718.581916 | -4718.512937 | -4718.512008 | -4718.687823 | -4720.596455 |
| <b>IN6-1<sub>Ru</sub></b>   | -4718.589464 | -4718.520344 | -4718.519416 | -4718.69443  | -4720.605762 |
| <b>IN5-2<sub>Ru</sub></b>   | -4718.626431 | -4718.556021 | -4718.555093 | -4718.73271  | -4720.627482 |
| <b>TS5-2<sub>Ru</sub></b>   | -4718.587735 | -4718.519046 | -4718.518117 | -4718.692064 | -4720.589413 |
| <b>IN6-2<sub>Ru</sub></b>   | -4718.590051 | -4718.520861 | -4718.519932 | -4718.696304 | -4720.59884  |
| <b>TS5-1a<sub>Cu</sub></b>  | -3927.471911 | -3927.404325 | -3927.403396 | -3927.579959 | -3929.399075 |
| <b>TS5-1b<sub>Cu</sub></b>  | -3927.466547 | -3927.39847  | -3927.397542 | -3927.576869 | -3929.393815 |
| <b>TS5-1c<sub>Cu</sub></b>  | -3927.441256 | -3927.373095 | -3927.372166 | -3927.552237 | -3929.375671 |
| <b>TS5-1'a<sub>Cu</sub></b> | -3927.468504 | -3927.4005   | -3927.399571 | -3927.578038 | -3929.398807 |

|                                         |              |              |              |              |               |
|-----------------------------------------|--------------|--------------|--------------|--------------|---------------|
| <b>TS5-1'b<sub>Cu</sub></b>             | -3927.46559  | -3927.397509 | -3927.396581 | -3927.576077 | -3929.394012  |
| <b>TS5-1'c<sub>Cu</sub></b>             | -3927.460203 | -3927.392505 | -3927.391577 | -3927.569719 | -3929.391326  |
| <b>TS5-1<sub>Cu/ent-L2</sub></b>        | -3927.477967 | -3927.410066 | -3927.409138 | -3927.587878 | -3929.401767  |
| <b>TS5-1a<sub>Cu/ent-L2</sub></b>       | -3927.46559  | -3927.397509 | -3927.396581 | -3927.576077 | -3929.394012  |
| <b>TS5-1b<sub>Cu/ent-L2</sub></b>       | -3927.466223 | -3927.398739 | -3927.39781  | -3927.574093 | -3929.39424   |
| <b>TS5-1c<sub>Cu/ent-L2</sub></b>       | -3927.456713 | -3927.388578 | -3927.38765  | -3927.56592  | -3929.387422  |
| <b>TS5-1'<sub>Cu/ent-L2</sub></b>       | -3927.487271 | -3927.419152 | -3927.418224 | -3927.597911 | -3929.411822  |
| <b>TS5-1'a<sub>Cu/ent-L2</sub></b>      | -3927.474466 | -3927.406534 | -3927.405606 | -3927.582742 | -3929.398618  |
| <b>TS5-1'b<sub>Cu/ent-L2</sub></b>      | -3927.466548 | -3927.398471 | -3927.397543 | -3927.576875 | -3929.393816  |
| <b>TS5-1'c<sub>Cu/ent-L2</sub></b>      | -3927.45237  | -3927.384414 | -3927.383486 | -3927.563262 | -3929.385665  |
| <b>IN9-1<sub>Ru</sub></b>               | -5142.746835 | -5142.667264 | -5142.666336 | -5142.866825 | -5145.027436  |
| <b>TS7-1<sub>Ru</sub></b>               | -5142.707648 | -5142.629463 | -5142.628535 | -5142.824015 | -5144.99305   |
| <b>IN9-1'<sub>Ru</sub></b>              | -5142.72936  | -5142.649714 | -5142.648786 | -5142.84961  | -5145.011296  |
| <b>TS7-1'<sub>Ru</sub></b>              | -5142.690976 | -5142.61255  | -5142.611622 | -5142.80919  | -5144.98104   |
| <b>IN9-2<sub>Cu</sub></b>               | -3928.66137  | -3928.592396 | -3928.591468 | -3928.772176 | -3930.60738   |
| <b>TS7-2<sub>Cu</sub></b>               | -3928.64431  | -3928.576003 | -3928.575075 | -3928.754247 | -3930.592617  |
| <b>IN9-2'<sub>Cu</sub></b>              | -3928.659922 | -3928.590965 | -3928.590037 | -3928.770734 | -3930.609616  |
| <b>TS7-2'<sub>Cu</sub></b>              | -3928.647614 | -3928.579564 | -3928.578636 | -3928.755294 | -3930.59368   |
| <b>IN3<sub>Cu</sub></b>                 | -3140.635506 | -3140.58319  | -3140.582261 | -3140.728796 | -3142.036082  |
| <b>IN4-1<sub>Cu</sub></b>               | -3140.659613 | -3140.608342 | -3140.607413 | -3140.749797 | -3142.063982  |
| <b>TS7-1<sub>Ru/ent-L2</sub></b>        | -5142.685913 | -5142.607541 | -5142.606612 | -5142.804953 | -5144.97288   |
| <b>TS7-1'<sub>Ru/ent-L2</sub></b>       | -5142.686521 | -5142.608121 | -5142.607193 | -5142.804901 | -5144.976308  |
| <b>TS4-2a<sub>Ru</sub></b>              | -4354.644024 | -4354.582501 | -4354.581573 | -4354.742842 | -4356.382393  |
| <b>TS4-2b<sub>Ru</sub></b>              | -4354.68362  | -4354.621862 | -4354.620933 | -4354.781195 | -4356.423062  |
| <b>IN5-2b<sub>Ru</sub></b>              | -4354.699985 | -4354.637796 | -4354.636868 | -4354.798769 | -4356.447454  |
| <b>TS5-2b<sub>Ru</sub></b>              | -4354.699922 | -4354.638191 | -4354.637263 | -4354.797527 | -4356.438652  |
| <b>TS4-2c<sub>Ru</sub></b>              | -4354.673755 | -4354.611994 | -4354.611065 | -4354.772594 | -4356.41507   |
| <b>IN5-2c<sub>Ru</sub></b>              | -4354.693794 | -4354.631984 | -4354.631055 | -4354.792053 | -4356.444686  |
| <b>TS4-2d<sub>Ru</sub></b>              | -4354.622632 | -4354.56062  | -4354.559692 | -4354.722332 | -4356.369287  |
| <b>TS4-3'<sub>Ru</sub></b>              | -4719.774977 | -4719.705414 | -4719.704486 | -4719.880093 | -4721.7985598 |
| <b>TS4-3<sub>Ru</sub></b>               | -4719.793693 | -4719.723764 | -4719.722835 | -4719.900356 | -4721.815687  |
| <b>1a</b>                               | -424.002934  | -423.994097  | -423.993169  | -424.036858  | -424.3169312  |
| <b>1a-2H</b>                            | -422.831963  | -422.823817  | -422.822888  | -422.864872  | -423.1138688  |
| <b>2a</b>                               | -787.96365   | -787.947015  | -787.946087  | -788.009309  | -788.5259682  |
| <b>3a</b>                               | -1212.014521 | -1211.988726 | -1211.987798 | -1212.071666 | -1212.886041  |
| <b>K<sub>3</sub>PO<sub>4</sub></b>      | -727.439651  | -727.429813  | -727.428884  | -727.477428  | -727.6643632  |
| <b>Cu(MeCN)<sub>4</sub><sup>+</sup></b> | -2254.495734 | -2254.455979 | -2254.455051 | -2254.572235 | -2255.610282  |
| <b>MeCN</b>                             | -132.706959  | -132.703445  | -132.702517  | -132.729479  | -132.8060109  |

$E_0$  = Sum of electronic and zero-point energies calculated by B3LYP-D3

$E$  = Sum of electronic and thermal energies calculated by B3LYP-D3

$H_{293.15}$  = Sum of electronic and thermal enthalpies calculated by B3LYP-D3

$G_{293.15}$  = Sum of electronic and thermal free energies calculated by B3LYP-D3

$E_{(\text{sol, B3LYP})}$  = Single point energies calculated by B3LYP-D3 in solvent

## Section 9. Calculated Imaginary Frequencies of All Transition States

### Species

| Species              | Frequency |
|----------------------|-----------|
| TS1-1 <sub>Ru</sub>  | -50.21    |
| TS1-2 <sub>Ru</sub>  | -60.6     |
| TS1-3 <sub>Ru</sub>  | -38.69    |
| TS2-1 <sub>Ru</sub>  | -46.08    |
| TS2-2 <sub>Ru</sub>  | -16.44    |
| TS1-N1 <sub>Ru</sub> | -57.47    |
| TS1-N2 <sub>Ru</sub> | -36.1     |
| TS1-P1 <sub>Ru</sub> | -23.73    |
| TS1-P2 <sub>Ru</sub> | -28.81    |
| TS1-4 <sub>Ru</sub>  | -85.47    |
| TS1-1a <sub>Ru</sub> | -57.47    |
| TS1-1b <sub>Ru</sub> | -57.67    |
| TS1-1c <sub>Ru</sub> | -36.1     |
| TS1-1d <sub>Ru</sub> | -23.73    |
| TS1-1e <sub>Ru</sub> | -28.81    |
| TS1-2a <sub>Ru</sub> | -38.69    |
| TS1-2b <sub>Ru</sub> | -19.82    |
| TS2-3 <sub>Ru</sub>  | -64.83    |
| TS3-1 <sub>Ru</sub>  | -41.02    |
| TS4-1 <sub>Ru</sub>  | -283.12   |
| TS3-2 <sub>Ru</sub>  | -399.79   |
| TS4-2 <sub>Ru</sub>  | -190.37   |
| TS3-2' <sub>Ru</sub> | -326.9    |
| TS4-2' <sub>Ru</sub> | -1215.68  |
| TS4-4 <sub>Ru</sub>  | -166.97   |
| TS4-1' <sub>Ru</sub> | -638.32   |
| TS4-4' <sub>Ru</sub> | -740.94   |
| TS4 <sub>Cu</sub>    | -350.92   |
| TS5-1 <sub>Cu</sub>  | -255.82   |
| TS5-1' <sub>Cu</sub> | -261.46   |
| TS6-1 <sub>Cu</sub>  | -1136.56  |
| TS6-2 <sub>Cu</sub>  | -312.63   |
| TS4' <sub>Cu</sub>   | -828.9    |
| TS5 <sub>Ru</sub>    | -38.69    |
| TS5-1 <sub>Ru</sub>  | -715.45   |
| TS5-2 <sub>Ru</sub>  | -819.15   |
| TS5-1a <sub>Cu</sub> | -274.92   |
| TS5-1b <sub>Cu</sub> | -119.28   |



|                                    |          |
|------------------------------------|----------|
| <b>TS5-1c<sub>Cu</sub></b>         | -141.84  |
| <b>TS5-1'a<sub>Cu</sub></b>        | -208.87  |
| <b>TS5-1'b<sub>Cu</sub></b>        | -208.15  |
| <b>TS5-1'c<sub>Cu</sub></b>        | -201.88  |
| <b>TS5-1<sub>Cu/ent-L2</sub></b>   | -208.15  |
| <b>TS5-1a<sub>Cu/ent-L2</sub></b>  | -208.15  |
| <b>TS5-1b<sub>Cu/ent-L2</sub></b>  | -288     |
| <b>TS5-1c<sub>Cu/ent-L2</sub></b>  | -102.05  |
| <b>TS5-1'<sub>Cu/ent-L2</sub></b>  | -261.46  |
| <b>TS5-1'a<sub>Cu/ent-L2</sub></b> | -194.49  |
| <b>TS5-1'b<sub>Cu/ent-L2</sub></b> | -119.28  |
| <b>TS5-1'c<sub>Cu/ent-L2</sub></b> | -195.83  |
| <b>TS7-1<sub>Ru</sub></b>          | -286.35  |
| <b>TS7-1'<sub>Ru</sub></b>         | -261.92  |
| <b>TS7-2<sub>Cu</sub></b>          | -220.99  |
| <b>TS7-2'<sub>Cu</sub></b>         | -138.88  |
| <b>TS3<sub>Cu</sub></b>            | -220.99  |
| <b>TS7-1<sub>Ru/ent-L2</sub></b>   | -373.51  |
| <b>TS7-1'<sub>Ru/ent-L2</sub></b>  | -443.68  |
| <b>TS4-2a<sub>Ru</sub></b>         | -340.48  |
| <b>TS4-2b<sub>Ru</sub></b>         | -383.25  |
| <b>TS5-2b<sub>Ru</sub></b>         | -1076.79 |
| <b>TS4-2c<sub>Ru</sub></b>         | -694.7   |
| <b>TS4-2d<sub>Ru</sub></b>         | -743.7   |
| <b>TS4-3'<sub>Ru</sub></b>         | -295.84  |
| <b>TS4-3<sub>Ru</sub></b>          | -372.56  |
